# Supplementary material for: Investigation of Volatile Components and Assessment of Antioxidant Potential in Seven Lamiaceae Plant Hydrosols
Source: MDPI journal article supplement (doi:10.3390/molecules29010145), 2023-12-26
Supplement: s1 [file s1]

*Supplementary Materials*

**Investigation of Volatile Components and Assessment of Antioxidant Potential in Seven Lamiaceae Plant Hydrosols**

## Supplementary Tables

Supplementary Table S1. Identified volatile metabolites of seven Lamiaceae plant hydrosols.

| No. | Compound name                                                    | Formula   | Relative content% |        |        |        |        |         |        |
|-----|------------------------------------------------------------------|-----------|-------------------|--------|--------|--------|--------|---------|--------|
|     |                                                                  |           | Tv HD             | Tm HD  | Mp HD  | Mo HD  | Ro HD  | Se HD   | La HD  |
| 1   | Butanoic acid, 2-methyl-, methyl ester                           | C6H12O2   | tr                | nd     | nd     | nd     | nd     | nd      | nd     |
| 2   | 1-Octen-3-ol                                                     | C8H16O    | 1.6135            | 1.9071 | 0.0273 | nd     | nd     | nd      | nd     |
| 3   | Chloroacetic acid, cyclohexyl ester                              | C8H13ClO2 | tr                | nd     | nd     | nd     | nd     | nd      | nd     |
| 4   | Hexenyl tiglate, 4Z-                                             | C11H18O2  | tr                | nd     | nd     | nd     | nd     | nd      | nd     |
| 5   | o-Cymene                                                         | C10H14    | 2.3984            | 0.3410 | nd     | nd     | nd     | nd      | nd     |
| 6   | Eucalyptol                                                       | C10H18O   | 3.6612            | 3.0541 | 4.2754 | 5.1455 | 6.9731 | 0.1632  | 2.7112 |
| 7   | 1H-2-Indenol, 2,3,4,5,6,7-hexahydro-1-(2-hydroxy-2-methylpropyl) | C13H22O2  | tr                | nd     | nd     | nd     | nd     | nd      | nd     |
| 8   | 2,6-Octadien-1-ol, 2,7-dimethyl-                                 | C10H18O   | tr                | nd     | nd     | nd     | nd     | nd      | nd     |
| 9   | Butanoic acid, 4-pentenyl ester                                  | C9H16O2   | 0.1287            | tr     | nd     | nd     | nd     | nd      | nd     |
| 10  | Benzene, 1-methyl-4-(1-methylethenyl)-                           | C10H12    | 0.0597            | nd     | nd     | nd     | 0.0237 | nd      | nd     |
| 11  | Linalool                                                         | C10H18O   | 4.8946            | 5.9509 | 0.2774 | 2.7061 | 6.3686 | 19.2715 | 0.3818 |
| 12  | 2,6-Octadien-1-ol, 3,7-dimethyl-, (Z)-                           | C10H18O   | 0.0443            | nd     | nd     | nd     | nd     | nd      | nd     |
| 13  | 7-Octen-4-ol, 2-methyl-6-methylene-, (S)-                        | C10H18O   | 0.0209            | nd     | nd     | nd     | nd     | nd      | nd     |
| 14  | Cyclohexanol, 1-methyl-4-(1-methylethenyl)-, cis-                | C10H18O   | 0.0684            | nd     | nd     | nd     | nd     | nd      | nd     |
| 15  | 2-Cyclohexen-1-ol, 1-methyl-4-(1-methylethyl)-, trans-           | C10H18O   | tr                | nd     | nd     | nd     | 0.0170 | nd      | nd     |
| 16  | 2-Cyclohexen-1-ol, 1-methyl-4-(1-methylethyl)-, cis-             | C10H18O   | 0.0235            | 0.0272 | nd     | nd     | nd     | nd      | nd     |
| 17  | Isopinocarveol                                                   | C10H16O   | 0.0510            | nd     | tr     | nd     | nd     | nd      | nd     |
| 18  | 1,2-15,16-Diepoxylhexadecane                                     | C16H30O2  | 0.0970            | nd     | nd     | nd     | nd     | nd      | nd     |
| 19  | 3-Cyclohexene-1-carboxaldehyde, 1,3,4-trimethyl-                 | C10H16O   | 0.1502            | nd     | nd     | nd     | nd     | 0.0174  | nd     |
| 20  | Ethanol, 2-(9,12-octadecadienyloxy)-, (Z,Z)-                     | C20H38O2  | 0.0111            | 0.0352 | nd     | nd     | nd     | nd      | 0.1339 |
| 21  | endo-Borneol                                                     | C10H18O   | 1.8083            | 2.0337 | 0.5643 | nd     | 5.5855 | nd      | nd     |
| 22  | 3-Cyclohexen-1-ol, 4-methyl-1-(1-methylethyl)-, (R)-             | C10H18O   | 3.0542            | nd     | nd     | nd     | 2.0065 | nd      | 3.0187 |
| 23  | Butanoic acid, 3-hexenyl ester, (E)-                             | C10H18O2  | 0.3914            | nd     | nd     | nd     | nd     | nd      | nd     |
| 24  | L-à-Terpineol                                                    | C10H18O   | 0.3081            | nd     | nd     | nd     | 2.4627 | nd      | 0.4924 |
| 25  | Dihydroxanthin                                                   | C17H24O5  | 0.0536            | nd     | nd     | nd     | nd     | nd      | nd     |
| 26  | Cyclohexanol, 5-methyl-2-(1-methylethenyl)-                      | C10H18O   | tr                | 0.0118 | nd     | nd     | tr     | nd      | nd     |
| 27  | 2-Cyclohexen-1-ol, 3-methyl-6-(1-methylethyl)-, cis-             | C10H18O   | 0.0143            | nd     | nd     | nd     | nd     | nd      | nd     |
| 28  | cis-p-mentha-1(7),8-dien-2-ol                                    | C10H16O   | 0.0139            | 0.0203 | nd     | nd     | 0.0298 | tr      | tr     |
| 29  | Isobornyl formate                                                | C11H18O2  | 0.0437            | nd     | nd     | nd     | nd     | 0.4519  | nd     |

|    |                                                                               |           |         |         |        |        |        |        |        |
|----|-------------------------------------------------------------------------------|-----------|---------|---------|--------|--------|--------|--------|--------|
| 30 | Benzene, 2-methoxy-4-methyl-1-(1-methylethyl)-                                | C11H16O   | 6.2762  | 2.2405  | nd     | nd     | nd     | nd     | nd     |
| 31 | (-)-Carvone                                                                   | C10H14O   | 1.7551  | nd      | 0.2512 | 1.6204 | nd     | nd     | nd     |
| 32 | Geraniol                                                                      | C10H18O   | 0.1222  | 0.3183  | nd     | 1.4782 | 4.0724 | nd     | nd     |
| 33 | Spiro[4.5]dec-6-en-8-one, 1,7-dimethyl-4-(1-methylethyl)-                     | C15H24O   | tr      | nd      | nd     | nd     | nd     | nd     | tr     |
| 34 | 2(3H)-Naphthalenone, 4,4a,5,6,7,8-hexahydro-1-methoxy-                        | C11H16O2  | tr      | nd      | nd     | nd     | nd     | nd     | nd     |
| 35 | 6-Octen-1-yn-3-ol, 3,7-dimethyl-                                              | C10H16O   | tr      | nd      | nd     | nd     | nd     | nd     | nd     |
| 36 | Benzene, 1-methoxy-4-(1-propenyl)-, (Z)-                                      | C10H12O   | 0.1426  | nd      | 1.2398 | nd     | nd     | nd     | nd     |
| 37 | Phenol, 2-methyl-5-(1-methylethyl)-                                           | C10H14O   | 1.8560  | 1.8690  | 0.1807 | nd     | nd     | tr     | nd     |
| 38 | Thymol                                                                        | C10H14O   | 18.8404 | 19.5366 | nd     | 1.3675 | 0.0692 | 5.3207 | 1.0919 |
| 39 | 2,6-Octadienoic acid, 3,7-dimethyl-, methyl ester, (Z)-                       | C11H18O2  | tr      | nd      | nd     | 0.0666 | nd     | nd     | nd     |
| 40 | (-)-8-p-Menthen-2-yl, acetate, trans                                          | C12H20O2  | 0.0195  | nd      | 0.4261 | nd     | nd     | nd     | nd     |
| 41 | 2-Cyclohexen-1-one, 3-methyl-6-(1-methylethylidene)-                          | C10H14O   | tr      | nd      | 0.1066 | nd     | 0.0452 | nd     | nd     |
| 42 | Cyclopropane, 1-methoxy-2,2-dimethyl-3-(3,3-dimethyl-1-propynyl)-             | C12H20O   | tr      | nd      | nd     | nd     | nd     | nd     | nd     |
| 43 | Phenol, 3-(1,1-dimethylethyl)-4-methoxy-                                      | C11H16O2  | 0.0580  | nd      | nd     | nd     | nd     | nd     | nd     |
| 44 | Phenol, 5-methyl-2-(1-methylethyl)-, acetate                                  | C12H16O2  | 0.0748  | 0.4030  | nd     | nd     | nd     | nd     | nd     |
| 45 | 3-Allyl-6-methoxyphenol                                                       | C10H12O2  | 0.0204  | nd      | 0.0353 | nd     | 0.0376 | nd     | 0.0662 |
| 46 | Geranyl acetate                                                               | C12H20O2  | 0.0233  | 0.1286  | nd     | 0.1516 | 0.0742 | tr     | nd     |
| 47 | Isobornyl propionate                                                          | C13H22O2  | 0.0233  | 0.0166  | nd     | nd     | nd     | nd     | nd     |
| 48 | Propanoic acid, 2-methyl-, 2-phenylethyl ester                                | C12H16O2  | tr      | nd      | nd     | nd     | nd     | nd     | nd     |
| 49 | 2-Cyclopenten-1-one, 3-methyl-2-(2-pentenyl)-, (Z)-                           | C11H16O   | tr      | nd      | 0.0673 | nd     | 0.0144 | 0.1150 | nd     |
| 50 | Methyleugenol                                                                 | C11H14O2  | 0.0440  | 0.0631  | 0.0975 | 0.5505 | 0.4481 | nd     | nd     |
| 51 | Benzene, 1,3,5-trimethoxy-                                                    | C9H12O3   | 0.0359  | 0.1483  | 0.0776 | nd     | nd     | 0.0645 | nd     |
| 52 | Propanoic acid, 2-methyl-, 1,7,7-trimethylbicyclo[2.2.1]hept-2-yl ester, exo- | C14H24O2  | 0.0121  | nd      | nd     | nd     | nd     | nd     | nd     |
| 53 | Caryophyllene                                                                 | C15H24    | 0.1823  | nd      | 0.1308 | nd     | nd     | nd     | nd     |
| 54 | Adamantane, 2-hydroperoxy-2-ethenyl-                                          | C12H18O2  | tr      | nd      | nd     | nd     | nd     | nd     | nd     |
| 55 | Ethanone, 1-(2-hydroxy-4-methoxyphenyl)-                                      | C9H10O3   | 0.2473  | 0.0840  | 0.4665 | 0.5262 | 0.0576 | 0.3548 | nd     |
| 56 | Humulene                                                                      | C15H24    | 0.0178  | nd      | 0.0500 | nd     | nd     | nd     | 0.1541 |
| 57 | (E)- $\alpha$ -Farnesene                                                      | C15H24    | tr      | nd      | 0.0366 | nd     | nd     | nd     | nd     |
| 58 | Cholestan-3-ol, 2-methylene-, (3 $\alpha$ ,5 $\alpha$ )-                      | C28H48O   | tr      | nd      | nd     | nd     | nd     | nd     | nd     |
| 59 | 2,6-Octadien-1-ol, 3,7-dimethyl-, propanoate, (Z)-                            | C13H22O2  | 0.0155  | nd      | nd     | nd     | nd     | nd     | nd     |
| 60 | $\zeta$ -Muurolene                                                            | C15H24    | 0.1161  | nd      | tr     | nd     | nd     | nd     | nd     |
| 61 | 8-Decene-3,5-dione, 2,4,6,9-tetramethyl-                                      | C14H24O2  | 0.0296  | nd      | 0.0914 | nd     | nd     | nd     | nd     |
| 62 | N,N-dipropionylphenethylamine                                                 | C14H19NO2 | tr      | nd      | nd     | nd     | nd     | nd     | nd     |
| 63 | Phenethyl palmitate                                                           | C24H40O2  | tr      | nd      | nd     | nd     | nd     | nd     | nd     |
| 64 | Guaia-1(10),11-diene                                                          | C15H24    | tr      | nd      | nd     | nd     | nd     | 0.0412 | nd     |

## Supplementary Material

|    |                                                                                                                                                |          |        |        |        |        |        |        |        |
|----|------------------------------------------------------------------------------------------------------------------------------------------------|----------|--------|--------|--------|--------|--------|--------|--------|
| 65 | Naphthalene, 1,2,4a,5,6,8a-hexahydro-4,7-dimethyl-1-(1-methylethyl)-,[1R-(1à,4aà,8aà)]-                                                        | C15H24   | 0.0144 | nd     | tr     | nd     | nd     | nd     | nd     |
| 66 | Butanoic acid, 3-methyl-, 1,7,7-trimethylbicyclo[2.2.1]hept-2-yl ester, exo-                                                                   | C15H26O2 | tr     | nd     | nd     | nd     | nd     | nd     | nd     |
| 67 | cis-Calamenene                                                                                                                                 | C15H22   | 0.0498 | nd     | nd     | nd     | nd     | nd     | nd     |
| 68 | 1-Heptatriacotanol                                                                                                                             | C37H76O  | 0.0267 | 0.0247 | nd     | nd     | nd     | 0.0150 | nd     |
| 69 | Tau-Cadinol acetate                                                                                                                            | C17H28O2 | tr     | nd     | nd     | nd     | nd     | nd     | nd     |
| 70 | (3R,5aS,9aR)-2,2,5a,9-Tetramethyl-3,4,5,6,7-hexahydro-2H-3,9a-methanobenzo[b]oxepine                                                           | C15H24O  | tr     | nd     | nd     | nd     | nd     | nd     | nd     |
| 71 | Caryophyllene oxide                                                                                                                            | C15H24O  | 0.2775 | 0.1563 | 0.1349 | 1.2640 | 0.0480 | 2.4263 | 0.6687 |
| 72 | p-Cymene-2,5-diol                                                                                                                              | C10H14O2 | tr     | nd     | nd     | nd     | nd     | 0.1361 | tr     |
| 73 | Butanoic acid, 3,7-dimethyl-2,6-octadienyl ester, (E)-                                                                                         | C14H24O2 | tr     | nd     | nd     | nd     | nd     | nd     | nd     |
| 74 | 6-epi-shyobunol                                                                                                                                | C15H26O  | tr     | nd     | 0.0351 | nd     | nd     | nd     | nd     |
| 75 | (-)-Spathulenol                                                                                                                                | C15H24O  | 0.0140 | 0.1176 | 0.0640 | 2.2058 | 0.0718 | 2.8024 | 1.3419 |
| 76 | 1H-Cycloprop[e]azulen-4-ol, decahydro-1,1,4,7-tetramethyl-, [1aR-(1aà,4à,4aà,7à,7aà,7bà)]-                                                     | C15H26O  | 0.1746 | nd     | 0.8540 | nd     | 0.0282 | 1.6843 | nd     |
| 77 | (1S,3aS,4S,5S,7aR,8R)-5-Isopropyl-1,7a-dimethyloctahydro-1H-1,4-methanoinden-8-ol                                                              | C15H26O  | tr     | nd     | 0.0185 | nd     | nd     | nd     | 0.0105 |
| 78 | (1R,3E,7E,11R)-1,5,5,8-Tetramethyl-12-oxabicyclo[9.1.0]dodeca-3,7-diene                                                                        | C15H24O  | tr     | nd     | nd     | nd     | nd     | nd     | nd     |
| 79 | (1R,7S,E)-7-Isopropyl-4,10-dimethylenecyclodec-5-enol                                                                                          | C15H24O  | tr     | 0.0145 | 0.0164 | 0.0353 | nd     | 0.0118 | nd     |
| 80 | Epicubenol                                                                                                                                     | C15H26O  | 0.0603 | 0.0220 | 0.0715 | nd     | nd     | nd     | nd     |
| 81 | 2-((2S,4aR)-4a,8-Dimethyl-1,2,3,4,4a,5,6,7-octahydronaphthalen-2-yl)propan-2-ol                                                                | C15H26O  | 0.0558 | nd     | nd     | nd     | nd     | nd     | nd     |
| 82 | Cubenol                                                                                                                                        | C15H26O  | tr     | nd     | nd     | nd     | nd     | nd     | nd     |
| 83 | Docosanoic acid, 8,9-dihydroxy-, methyl ester                                                                                                  | C23H46O4 | 0.0142 | nd     | nd     | nd     | nd     | nd     | nd     |
| 84 | i-Propyl 5,8,11,14,17-eicosapentaenoate                                                                                                        | C23H36O2 | 0.0104 | nd     | nd     | nd     | nd     | nd     | nd     |
| 85 | .tau.-Cadinol                                                                                                                                  | C15H26O  | 0.2888 | nd     | 0.0725 | 0.6238 | 0.0326 | 0.3298 | 0.5787 |
| 86 | (3S,3aR,3bR,4S,7R,7aR)-4-Isopropyl-3,7-dimethyloctahydro-1H-cyclopenta[1,3]cyclopropa[1,2]benzen-3-ol                                          | C15H26O  | tr     | nd     | nd     | nd     | nd     | nd     | tr     |
| 87 | 2-Naphthalenemethanol, 2,3,4,4a,5,6,7,8-octahydro-à,à,4a,8-tetramethyl-, [2R-(2à,4aà,8à)]-                                                     | C15H26O  | tr     | nd     | nd     | nd     | nd     | nd     | nd     |
| 88 | à-Cadinol                                                                                                                                      | C15H26O  | 0.0308 | nd     | 0.1305 | nd     | nd     | 0.1313 | nd     |
| 89 | Isoaromadendrene epoxide                                                                                                                       | C15H24O  | 0.0291 | tr     | 0.0163 | nd     | nd     | nd     | nd     |
| 90 | Benz[e]azulene-3,8-dione, 5-[(acetyloxy)methyl]-3a,4,6a,7,9,10,10a,10b-octahydro-3a,10a-dihydroxy-2,10-dimethyl-, (3aà,6aà,10à,10aà,10bà)-(+)- | C19H24O6 | tr     | nd     | nd     | nd     | nd     | nd     | nd     |
| 91 | Heptadecane                                                                                                                                    | C17H36   | tr     | 0.0798 | 0.0105 | nd     | nd     | nd     | nd     |
| 92 | Benzene, 1-(1,1-dimethylethyl)-4-methoxy-                                                                                                      | C11H16O  | tr     | nd     | nd     | nd     | nd     | nd     | nd     |
| 93 | Propanoic acid, 2-(3-acetoxy-4,4,14-trimethylandro-8-en-17-yl)-                                                                                | C27H42O4 | tr     | nd     | nd     | nd     | nd     | nd     | 0.0139 |
| 94 | Terpinen-4-ol                                                                                                                                  | C10H18O  | nd     | 4.2203 | nd     | 0.5528 | tr     | 0.3680 | 0.1803 |
| 95 | 3-Octanone                                                                                                                                     | C8H16O   | nd     | 2.3914 | 0.0823 | 4.6015 | nd     | 6.8098 | 0.5702 |
| 96 | Benzene, 2-methoxy-1-methyl-4-(1-methylethyl)-                                                                                                 | C11H16O  | nd     | 1.0979 | nd     | nd     | nd     | nd     | nd     |
| 97 | α-Terpineol                                                                                                                                    | C10H18O  | nd     | 0.5004 | nd     | nd     | nd     | nd     | nd     |



|     |                                                                                                                        |             |    |        |        |         |    |        |        |
|-----|------------------------------------------------------------------------------------------------------------------------|-------------|----|--------|--------|---------|----|--------|--------|
| 98  | D-Allose                                                                                                               | C6H12O6     | nd | 0.4867 | nd     | nd      | nd | nd     | nd     |
| 99  | (2S,4R)-4-Methyl-2-(2-methylprop-1-en-1-yl)tetrahydro-2H-pyran                                                         | C10H18O     | nd | 0.3266 | nd     | 3.5400  | nd | 0.1761 | nd     |
| 100 | Phenol, 2-methoxy-3-(2-propenyl)-                                                                                      | C10H12O2    | nd | 0.2331 | nd     | nd      | nd | nd     | 0.0537 |
| 101 | t-Cadinol                                                                                                              | C15H26O     | nd | 0.1911 | nd     | nd      | nd | nd     | nd     |
| 102 | (1R,2R,5S)-5-Methyl-2-(prop-1-en-2-yl)cyclohexanol                                                                     | C10H18O     | nd | 0.1683 | nd     | 12.7966 | tr | nd     | nd     |
| 103 | 1-Hepten-3-ol                                                                                                          | C7H14O      | nd | 0.1114 | nd     | nd      | nd | nd     | nd     |
| 104 | 7-Benzofuranol, 2,3-dihydro-2,2-dimethyl-                                                                              | C10H12O2    | nd | 0.1094 | nd     | nd      | nd | nd     | nd     |
| 105 | 3,4-Altrosan                                                                                                           | C6H10O5     | nd | 0.0972 | nd     | nd      | nd | nd     | nd     |
| 106 | Cyclohexanone, 2-(1-methylethylidene)-                                                                                 | C9H14O      | nd | 0.0604 | nd     | nd      | nd | nd     | nd     |
| 107 | 1,7,7-Trimethylbicyclo[2.2.1]heptan-2-ol                                                                               | C10H18O     | nd | 0.0536 | nd     | nd      | nd | nd     | nd     |
| 108 | 2,6-Octadien-1-ol, 3,7-dimethyl-, acetate, (Z)-                                                                        | C12H20O2    | nd | 0.0474 | 0.0273 | 0.0661  | nd | nd     | nd     |
| 109 | Bicyclo[2.2.1]heptane-2,5-diol, 1,7,7-trimethyl-, (2-endo,5-exo)-                                                      | C10H18O2    | nd | 0.0471 | nd     | nd      | nd | nd     | nd     |
| 110 | 2-Cyclopenten-1-one, 2-(2-butenyl)-3-methyl-, (Z)-                                                                     | C10H14O     | nd | 0.0468 | nd     | nd      | nd | nd     | nd     |
| 111 | exo-2,7,7-trimethylbicyclo[2.2.1]heptan-2-ol                                                                           | C10H18O     | nd | 0.0445 | nd     | nd      | nd | tr     | nd     |
| 112 | 3-Nonenoic acid                                                                                                        | C9H16O2     | nd | 0.0438 | nd     | nd      | nd | nd     | nd     |
| 113 | Cyclohexene, 6-butyl-1-nitro-                                                                                          | C10H17NO2   | nd | 0.0386 | nd     | nd      | nd | nd     | nd     |
| 114 | 6,6-Dimethyl-9-propenyl-1,4-dioxo-spiro[4.5]decane                                                                     | C13H22O2    | nd | 0.0340 | nd     | nd      | nd | nd     | nd     |
| 115 | 3,5-Dimethoxy-4-hydroxyphenylacetic acid                                                                               | C10H12O5    | nd | 0.0340 | nd     | nd      | nd | nd     | nd     |
| 116 | 3,5-Dimethoxy-4-hydroxytoluene                                                                                         | C9H12O3     | nd | 0.0303 | nd     | nd      | nd | nd     | nd     |
| 117 | 4,4'-(3,3'-Dinitro-4,4'-biphenylenebisazo)diphenol                                                                     | C24H16N6O6  | nd | 0.0301 | nd     | nd      | nd | nd     | nd     |
| 118 | 3,6-Octadien-1-ol, 3,7-dimethyl-, (Z)-                                                                                 | C10H18O     | nd | 0.0285 | nd     | 0.1725  | nd | nd     | nd     |
| 119 | trans-Z- $\alpha$ -Bisabolene epoxide                                                                                  | C15H24O     | nd | 0.0285 | nd     | nd      | nd | nd     | nd     |
| 120 | Benzene, 1,2,3-trimethoxy-5-methyl-                                                                                    | C10H14O3    | nd | 0.0228 | nd     | nd      | nd | nd     | nd     |
| 121 | 1-Chlorosulfonyl-3-methyl-1-azaspiro[3.5]nonan-2-one                                                                   | C9H14ClNO3S | nd | 0.0222 | nd     | nd      | nd | nd     | nd     |
| 122 | $\alpha$ -Cadinol                                                                                                      | C15H26O     | nd | 0.0218 | nd     | nd      | nd | nd     | nd     |
| 123 | 1,6-Octadiene, 3-ethoxy-3,7-dimethyl-                                                                                  | C12H22O     | nd | 0.0182 | nd     | nd      | nd | nd     | nd     |
| 124 | Butanamide, N-methyl-4-(methylthio)-2-(2,2-dimethylpropylidene)amino-                                                  | C11H22N2OS  | nd | 0.0173 | nd     | nd      | nd | nd     | nd     |
| 125 | Oxime-, methoxy-phenyl_                                                                                                | C8H9NO2     | nd | 0.0168 | nd     | nd      | nd | nd     | nd     |
| 126 | 1-(4-Methoxy-2-nitroanilino)-1-deoxy-a-d-arabinofuranose                                                               | C12H16N2O7  | nd | 0.0165 | nd     | nd      | nd | nd     | nd     |
| 127 | Eicosane                                                                                                               | C20H42      | nd | 0.0163 | nd     | nd      | nd | nd     | nd     |
| 128 | Nerolidyl acetate                                                                                                      | C17H28O2    | nd | 0.0157 | nd     | nd      | nd | nd     | nd     |
| 129 | 5 $\alpha$ ,7 $\alpha$ H,10 $\alpha$ -Eudesm-11-en-1 $\alpha$ -ol                                                      | C15H26O     | nd | 0.0154 | nd     | nd      | nd | nd     | nd     |
| 130 | 2,2,4-Trimethyl-1,3-pentanediol diisobutyrate                                                                          | C16H30O4    | nd | 0.0148 | nd     | nd      | nd | nd     | nd     |
| 131 | Benzene, (3-octylundecyl)-                                                                                             | C25H44      | nd | 0.0146 | nd     | nd      | nd | nd     | nd     |
| 132 | Hexadecanoic acid, 1a,2,5,5a,6,9,10,10a-octahydro-5a-hydroxy-4-(hydroxymethyl)-1,1,7,9-tetramethyl-6,11-dioxo-1H-2,8a- | C36H56O6    | nd | 0.0139 | nd     | nd      | nd | nd     | nd     |

|     |                                                                                                                               |             |    |        |    |        |        |    |        |
|-----|-------------------------------------------------------------------------------------------------------------------------------|-------------|----|--------|----|--------|--------|----|--------|
|     | methanocyclopenta[a]cyclopropa[e]cyclodecen-5-yl ester, [1aR-(1α,2α,5α,5α,8α,9α,10α)]-                                        |             |    |        |    |        |        |    |        |
| 133 | 2-Phenylacetamide, N-(1-phenyl-2-propyl)-                                                                                     | C17H19NO    | nd | 0.0139 | nd | nd     | nd     | nd | nd     |
| 134 | Ethanol, 2-(3,3-dimethylcyclohexylidene)-, (Z)-                                                                               | C10H18O     | nd | 0.0132 | nd | nd     | 0.2363 | nd | nd     |
| 135 | Butanoic acid, 1,7,7-trimethylbicyclo[2.2.1]hept-2-yl ester, endo-                                                            | C14H24O2    | nd | 0.0119 | nd | nd     | nd     | nd | nd     |
| 136 | Pentadecane, 3-methyl-                                                                                                        | C16H34      | nd | 0.0117 | nd | nd     | nd     | nd | nd     |
| 137 | 2-Propanone, 1-(4-hydroxy-3-methoxyphenyl)-                                                                                   | C10H12O3    | nd | 0.0111 | nd | nd     | nd     | nd | nd     |
| 138 | 10-Hydroxydecanoic acid, methyl ester                                                                                         | C11H22O3    | nd | 0.0109 | nd | nd     | nd     | nd | nd     |
| 139 | 2,4-Diazapentane, N,N'-dimethyl-3,3-bis[cycloazapropyl]-                                                                      | C9H20N4     | nd | 0.0106 | nd | nd     | nd     | nd | nd     |
| 140 | 2,5-Octadecadiynoic acid, methyl ester                                                                                        | C19H30O2    | nd | tr     | nd | 0.4747 | nd     | tr | nd     |
| 141 | Heptacosane, 1-chloro-                                                                                                        | C27H55Cl    | nd | tr     | nd | nd     | nd     | nd | nd     |
| 142 | 1,5-Hexadiene, 3,3,4,4-tetrafluoro-                                                                                           | C6H6F4      | nd | tr     | nd | nd     | nd     | nd | nd     |
| 143 | (E)-α-Famesene                                                                                                                | C15H24      | nd | tr     | nd | nd     | nd     | nd | nd     |
| 144 | 2,5,5,8a-Tetramethyl-3,5,6,7,8,8a-hexahydro-2H-naphthalen-1-one                                                               | C14H22O     | nd | tr     | nd | nd     | nd     | nd | nd     |
| 145 | Heptadecane, 9-hexyl-                                                                                                         | C23H48      | nd | tr     | nd | nd     | nd     | nd | nd     |
| 146 | 2,7-Diphenyl-1,6-dioxopyridazino[4,5:2',3']pyrrolo[4',5'-d]pyridazine                                                         | C20H13N5O2  | nd | tr     | nd | nd     | nd     | nd | nd     |
| 147 | (E)-15,16-Dinorlabda-8(17),12-dien-14-al                                                                                      | C18H28O     | nd | tr     | nd | nd     | nd     | nd | nd     |
| 148 | Benzenemethanol, 4-methyl-α-(1-methyl-2-propenyl)-, (R*,R*)-                                                                  | C12H16O     | nd | tr     | nd | nd     | nd     | nd | nd     |
| 149 | 3,5-Heptadienal, 2-ethylidene-6-methyl-                                                                                       | C10H14O     | nd | tr     | nd | nd     | nd     | nd | 0.0433 |
| 150 | 9-Nonadecene                                                                                                                  | C19H38      | nd | tr     | nd | nd     | nd     | nd | nd     |
| 151 | α-D-Mannofuranoside, farnesyl-                                                                                                | C21H36O6    | nd | tr     | nd | nd     | nd     | nd | nd     |
| 152 | Methanone, (phenyl)(4-pyridyl)-, 2-tolylsulfonylhydrazone                                                                     | C19H17N3O2S | nd | tr     | nd | nd     | nd     | nd | nd     |
| 153 | 2,5,5,8a-Tetramethyl-4-methylene-6,7,8,8a-tetrahydro-4H,5H-chromen-4a-yl hydroperoxide                                        | C14H22O3    | nd | tr     | nd | nd     | nd     | nd | nd     |
| 154 | 2-Propen-1-ol, 3-(2,6,6-trimethyl-1-cyclohexen-1-yl)-                                                                         | C12H20O     | nd | tr     | nd | nd     | nd     | nd | nd     |
| 155 | Dibutyl phthalate                                                                                                             | C16H22O4    | nd | tr     | tr | nd     | nd     | nd | nd     |
| 156 | 4-isopropyl-1,6-dimethyl-1,2,3,4-tetrahydronaphthalene                                                                        | C15H22      | nd | tr     | nd | nd     | nd     | nd | nd     |
| 157 | Octadecane, 3-ethyl-5-(2-ethylbutyl)-                                                                                         | C26H54      | nd | tr     | nd | 0.0975 | tr     | nd | nd     |
| 158 | Phenol, 2-methoxy-6-(1-propenyl)-                                                                                             | C10H12O2    | nd | tr     | nd | nd     | nd     | nd | nd     |
| 159 | Ethanol, 2-(9-octadecenyl)-, (Z)-                                                                                             | C20H40O2    | nd | tr     | nd | nd     | nd     | nd | nd     |
| 160 | 1-Nonadecanamine, N,N-dimethyl-                                                                                               | C21H45N     | nd | tr     | nd | nd     | nd     | nd | nd     |
| 161 | Ethanone, 1-(4-hydroxy-3,5-dimethoxyphenyl)-                                                                                  | C10H12O4    | nd | tr     | nd | nd     | nd     | nd | nd     |
| 162 | 9,10-Secocholesta-5,7,10(19)-triene-3,24,25-triol, (3α,5Z,7E)-                                                                | C27H44O3    | nd | tr     | nd | nd     | nd     | nd | nd     |
| 163 | α-acorenol                                                                                                                    | C15H26O     | nd | tr     | nd | nd     | nd     | nd | nd     |
| 164 | Perhydroindene-4-carboxylic acid, 6-acetoxy-2,3-epoxy-1,1-epoxymethyl-3a-hydroxy-5-isopropenyl-7a-methyl-7-oxo-, methyl ester | C18H22O8    | nd | tr     | nd | nd     | nd     | nd | nd     |
| 165 | Cholestan-3-one, cyclic 1,2-ethanediyl acetal, (5α)-                                                                          | C29H50O2    | nd | tr     | nd | nd     | nd     | nd | nd     |

|     |                                                                                                                                        |            |    |    |         |    |        |    |        |
|-----|----------------------------------------------------------------------------------------------------------------------------------------|------------|----|----|---------|----|--------|----|--------|
| 166 | Cyclohexanone, 2-(2-butyryl)-                                                                                                          | C10H14O    | nd | tr | nd      | nd | nd     | nd | nd     |
| 167 | 9-Octadecenoic acid, (2-phenyl-1,3-dioxolan-4-yl)methyl ester, cis-                                                                    | C28H44O4   | nd | tr | nd      | nd | nd     | nd | nd     |
| 168 | i-Propyl 12-methyl-tridecanoate                                                                                                        | C17H34O2   | nd | tr | nd      | nd | nd     | nd | nd     |
| 169 | Cholestan-3-ol, 2-methylene-, (3 $\alpha$ ,5 $\alpha$ )-                                                                               | C28H48O    | nd | tr | nd      | nd | nd     | nd | nd     |
| 170 | Methyl 6,7-di-O-acetyl-2,3,4-tri-O-methyl- $\alpha$ -glycero-D-glucoheptopyranoside                                                    | C15H26O9   | nd | tr | nd      | nd | nd     | nd | nd     |
| 171 | Bicyclo[3.1.0]hex-2-ene, 4-methylene-1-(1-methylethyl)-                                                                                | C10H14     | nd | tr | nd      | nd | 0.0236 | nd | nd     |
| 172 | Bicyclo[3.1.0]hex-3-en-2-ol, 2-methyl-5-(1-methylethyl)-, (1 $\alpha$ ,2 $\alpha$ ,5 $\alpha$ )-                                       | C10H16O    | nd | tr | nd      | nd | nd     | nd | nd     |
| 173 | 2-Nonadecanone 2,4-dinitrophenylhydrazine                                                                                              | C25H42N4O4 | nd | tr | nd      | tr | nd     | nd | nd     |
| 174 | 7-epi-cis-sesquisabinene hydrate                                                                                                       | C15H26O    | nd | tr | tr      | nd | nd     | nd | tr     |
| 175 | Oleic acid, 3-(octadecyloxy)propyl ester                                                                                               | C39H76O3   | nd | tr | nd      | nd | nd     | nd | nd     |
| 176 | Dodecane, 5,8-diethyl-                                                                                                                 | C16H34     | nd | tr | nd      | nd | nd     | nd | nd     |
| 177 | Hexadecanoic acid, ethyl ester                                                                                                         | C18H36O2   | nd | tr | nd      | nd | nd     | nd | nd     |
| 178 | 9-Hexadecenoic acid, 9-octadecenyl ester, (Z,Z)-                                                                                       | C34H64O2   | nd | tr | nd      | nd | nd     | nd | nd     |
| 179 | 4-(3,5-Dimethoxydecyl)-1,2-dimethoxybenzene                                                                                            | C20H34O4   | nd | tr | nd      | nd | nd     | nd | nd     |
| 180 | Carvone                                                                                                                                | C10H14O    | nd | nd | 26.8502 | nd | nd     | nd | 1.7867 |
| 181 | cis-Dihydrocarvone                                                                                                                     | C10H16O    | nd | nd | 10.4092 | nd | nd     | nd | nd     |
| 182 | Cyclohexanone, 2-methyl-5-(1-methylethenyl)-, trans-                                                                                   | C10H16O    | nd | nd | 0.7362  | nd | nd     | nd | nd     |
| 183 | Bicyclo[3.1.0]hexan-3-ol, 4-methyl-1-(1-methylethyl)-                                                                                  | C10H18O    | nd | nd | 0.3709  | nd | nd     | nd | nd     |
| 184 | Citral                                                                                                                                 | C10H16O    | nd | nd | 0.2677  | nd | nd     | nd | nd     |
| 185 | trans-Carveol                                                                                                                          | C10H16O    | nd | nd | 0.2468  | nd | nd     | nd | nd     |
| 186 | Isopimara-9(11),15-diene                                                                                                               | C20H32     | nd | nd | 0.2016  | nd | nd     | nd | nd     |
| 187 | (-)- $\alpha$ -Bourbonene                                                                                                              | C15H24     | nd | nd | 0.1210  | nd | nd     | nd | nd     |
| 188 | Bicyclo[3.1.0]hexan-3-one, 4-methyl-1-(1-methylethyl)-                                                                                 | C10H16O    | nd | nd | 0.1172  | nd | nd     | nd | nd     |
| 189 | Ketone, 3 $\alpha$ ,4,5,6,7,7a-hexahydro-7 $\alpha$ -methyl-1 $\alpha$ -indanyl methyl                                                 | C12H20O    | nd | nd | 0.0993  | nd | nd     | nd | nd     |
| 190 | 1-Isopropyl-4,7-dimethyl-1,2,3,5,6,8a-hexahydronaphthalene                                                                             | C15H24     | nd | nd | 0.0804  | nd | nd     | nd | 0.3593 |
| 191 | isolekene                                                                                                                              | C15H24     | nd | nd | 0.0631  | nd | nd     | nd | nd     |
| 192 | (1R,4aR,4bS,7S,10aR)-1,4a,7-Trimethyl-7-vinyl-1,2,3,4,4a,4b,5,6,7,8,10,10a-dodecahydrophenanthrene-1-carbaldehyde                      | C20H30O    | nd | nd | 0.0405  | nd | nd     | nd | nd     |
| 193 | Hibaene                                                                                                                                | C20H32     | nd | nd | 0.0381  | nd | nd     | nd | nd     |
| 194 | Limonene oxide, cis-                                                                                                                   | C10H16O    | nd | nd | 0.0339  | nd | nd     | nd | nd     |
| 195 | 1-Nonen-3-ol                                                                                                                           | C9H18O     | nd | nd | 0.0329  | nd | nd     | nd | nd     |
| 196 | 2,4-Di-tert-butylphenol                                                                                                                | C14H22O    | nd | nd | 0.0310  | nd | tr     | nd | nd     |
| 197 | 1H-Cycloprop[e]azulene, 1a,2,3,5,6,7,7a,7b-octahydro-1,1,4,7-tetramethyl-, [1aR-(1a $\alpha$ ,7 $\alpha$ ,7a $\alpha$ ,7b $\alpha$ )]- | C15H24     | nd | nd | 0.0283  | nd | nd     | nd | nd     |
| 198 | trans-Carveyl acetate                                                                                                                  | C12H18O2   | nd | nd | 0.0265  | nd | nd     | nd | nd     |
| 199 | cis-Murola-4(15),5-diene                                                                                                               | C15H24     | nd | nd | 0.0263  | nd | nd     | nd | nd     |
| 200 | 5,9-Dodecadien-2-one, 6,10-dimethyl-, (E,E)-                                                                                           | C14H24O    | nd | nd | 0.0252  | nd | nd     | nd | nd     |

## Supplementary Material

|     |                                                                                                                                                                                                      |            |    |    |        |        |        |        |        |
|-----|------------------------------------------------------------------------------------------------------------------------------------------------------------------------------------------------------|------------|----|----|--------|--------|--------|--------|--------|
| 201 | Germacrene D                                                                                                                                                                                         | C15H24     | nd | nd | 0.0251 | nd     | nd     | nd     | nd     |
| 202 | Tetradecane, 2,6,10-trimethyl-                                                                                                                                                                       | C17H36     | nd | nd | 0.0249 | nd     | nd     | nd     | nd     |
| 203 | 1H-2,8a-Methanocyclopenta[a]cyclopropa[e]cyclodecen-11-one,<br>1a,2,5,5a,6,9,10,10a-octahydro-5,5a,6-trihydroxy-1,4-bis(hydroxymethyl)-1,7,9-<br>trimethyl-, [1S-(1à,1aà,2à,5à,5aà,6à,8aà,9à,10aà)]- | C20H28O6   | nd | nd | 0.0182 | nd     | 0.0125 | nd     | nd     |
| 204 | Selin-6-en-4à-ol                                                                                                                                                                                     | C15H26O    | nd | nd | 0.0152 | nd     | nd     | nd     | nd     |
| 205 | 10,10-Dimethyl-2,6-dimethylenebicyclo[7.2.0]undecan-5á-ol                                                                                                                                            | C15H24O    | nd | nd | 0.0116 | nd     | nd     | nd     | nd     |
| 206 | (1S,4aR,8aS)-1-Isopropyl-7-methyl-4-methylene-1,2,3,4,4a,5,6,8a-<br>octahydronaphthalene                                                                                                             | C15H24     | nd | nd | 0.0115 | nd     | nd     | nd     | nd     |
| 207 | Bicyclo[3.1.0]hexan-3-ol, 4-methyl-1-(1-methylethyl)-, (1à,3á,4á,5à)-                                                                                                                                | C10H18O    | nd | nd | tr     | nd     | nd     | nd     | nd     |
| 208 | Doconexent                                                                                                                                                                                           | C22H32O2   | nd | nd | tr     | nd     | nd     | 0.0489 | nd     |
| 209 | Melezitose                                                                                                                                                                                           | C18H32O16  | nd | nd | tr     | nd     | nd     | nd     | nd     |
| 210 | (Z)-Hex-3-enyl (E)-2-methylbut-2-enoate                                                                                                                                                              | C11H18O2   | nd | nd | tr     | nd     | nd     | nd     | nd     |
| 211 | á-copaene                                                                                                                                                                                            | C15H24     | nd | nd | tr     | nd     | nd     | 0.0256 | nd     |
| 212 | 1,4-Methanoazulen-3-ol, decahydro-1,5,5,8a-tetramethyl-, [1S-<br>(1à,3á,3aá,4à,8aá)]-                                                                                                                | C15H26O    | nd | nd | tr     | nd     | tr     | nd     | nd     |
| 213 | Carvone oxide, cis-                                                                                                                                                                                  | C10H14O2   | nd | nd | tr     | nd     | nd     | nd     | nd     |
| 214 | 1H-Cycloprop[e]azulene, decahydro-1,1,7-trimethyl-4-methylene-                                                                                                                                       | C15H24     | nd | nd | tr     | nd     | nd     | nd     | nd     |
| 215 | (S)-2,2,6-Trimethyl-6-((S)-4-methylcyclohex-3-en-1-yl)dihydro-2H-pyran-<br>3(4H)-one                                                                                                                 | C15H24O2   | nd | nd | tr     | 0.2577 | 0.0359 | nd     | 0.4357 |
| 216 | Furan, 2,5-diethyltetrahydro-                                                                                                                                                                        | C8H16O     | nd | nd | tr     | nd     | nd     | nd     | nd     |
| 217 | 3-Nonanol                                                                                                                                                                                            | C9H20O     | nd | nd | tr     | nd     | nd     | nd     | nd     |
| 218 | 1-Naphthalenol, 1,2,3,4,4a,7,8,8a-octahydro-1,6-dimethyl-4-(1-methylethyl)-,<br>[1S-(1à,4à,4aà,8aà)]-                                                                                                | C15H26O    | nd | nd | tr     | nd     | nd     | nd     | nd     |
| 219 | 1-Hexadecanol, 2-methyl-                                                                                                                                                                             | C17H36O    | nd | nd | tr     | nd     | nd     | nd     | nd     |
| 220 | 8,11,14-Eicosatrienoic acid, methyl ester, (Z,Z,Z)-                                                                                                                                                  | C21H36O2   | nd | nd | tr     | nd     | nd     | nd     | nd     |
| 221 | 1H-Cyclopropa[3,4]benz[1,2-e]azulene-5,7b,9,9a-tetrol, 1a,1b,4,4a,5,7a,8,9-<br>octahydro-3-(hydroxymethyl)-1,1,6,8-tetramethyl-, 5,9,9a-triacetate, [1aR-<br>(1aà,1bà,4aà,5à,7aà,7bà,8à,9a,9aà)]-    | C26H36O8   | nd | nd | tr     | nd     | nd     | nd     | nd     |
| 222 | Benzoic acid, 4-methoxy-, methyl ester                                                                                                                                                               | C9H10O3    | nd | nd | tr     | nd     | nd     | nd     | nd     |
| 223 | 2,6-Dimethyl-1,3,5,7-octatetraene, E,E-                                                                                                                                                              | C10H14     | nd | nd | tr     | nd     | nd     | nd     | nd     |
| 224 | Globulol                                                                                                                                                                                             | C15H26O    | nd | nd | tr     | nd     | nd     | nd     | nd     |
| 225 | Hexadecane, 1,1-bis(dodecyloxy)-                                                                                                                                                                     | C40H82O2   | nd | nd | tr     | nd     | nd     | nd     | nd     |
| 226 | 13-Heptadecyn-1-ol                                                                                                                                                                                   | C17H32O    | nd | nd | tr     | nd     | nd     | nd     | nd     |
| 227 | Aspidospermidin-17-ol, 1-acetyl-19,21-epoxy-15,16-dimethoxy-                                                                                                                                         | C23H30N2O5 | nd | nd | tr     | nd     | nd     | nd     | nd     |
| 228 | Z,Z,Z-4,6,9-Nonadecatriene                                                                                                                                                                           | C19H34     | nd | nd | tr     | nd     | nd     | nd     | nd     |
| 229 | Octadecane, 6-methyl-                                                                                                                                                                                | C19H40     | nd | nd | tr     | nd     | nd     | nd     | nd     |
| 230 | 1H-Indene, 3-(bromomethyl)-1,1-dimethyl-                                                                                                                                                             | C12H13Br   | nd | nd | tr     | nd     | nd     | nd     | nd     |
| 231 | Cyclohexanone, 2,2-dimethyl-5-(3-methyloxiranyl)-, [2à(R*),3à]-(.+.-.)-                                                                                                                              | C11H18O2   | nd | nd | nd     | 0.0668 | nd     | nd     | nd     |
| 232 | 10-Undecyn-1-ol                                                                                                                                                                                      | C11H20O    | nd | nd | nd     | 1.8064 | nd     | nd     | nd     |

|     |                                                                                                                                                      |             |    |    |    |        |        |        |        |
|-----|------------------------------------------------------------------------------------------------------------------------------------------------------|-------------|----|----|----|--------|--------|--------|--------|
| 233 | Z,Z-4,16-Octadecadien-1-ol acetate                                                                                                                   | C20H36O2    | nd | nd | nd | 0.3050 | nd     | nd     | nd     |
| 234 | 4-Hexen-1-ol, 5-methyl-2-(1-methylethenyl)-                                                                                                          | C10H18O     | nd | nd | nd | 0.7919 | nd     | nd     | nd     |
| 235 | Terpineol                                                                                                                                            | C10H18O     | nd | nd | nd | 0.4324 | nd     | 0.3394 | nd     |
| 236 | Cyclohexanol, 2-methyl-5-(1-methylethenyl)-, (1à,2à,5à)-                                                                                             | C10H18O     | nd | nd | nd | 0.4048 | nd     | 0.3007 | nd     |
| 237 | Bicyclo[5.1.0]octane, 8-(1-methylethylidene)-                                                                                                        | C11H18      | nd | nd | nd | 0.3883 | nd     | nd     | nd     |
| 238 | 3-Cyclohexene-1-methanol, 5-hydroxy-à,à,4-trimethyl-, (1S-trans)-                                                                                    | C10H18O2    | nd | nd | nd | 0.0393 | nd     | nd     | nd     |
| 239 | Paromomycin                                                                                                                                          | C23H45N5O14 | nd | nd | nd | 0.2843 | nd     | nd     | nd     |
| 240 | Longipinene epoxide                                                                                                                                  | C15H24O     | nd | nd | nd | tr     | nd     | nd     | nd     |
| 241 | 2,6-Octadienal, 3,7-dimethyl-, (Z)-                                                                                                                  | C10H16O     | nd | nd | nd | 0.6797 | nd     | 1.6831 | nd     |
| 242 | 1-Methyl-7-azabicyclo[4.1.0]hepta-2,4-diene-7-carboxylic acid, 3,17-diacetoxy-4,4,10,13-tetramethylhexadecahydrocyclopenta[a]phenanthrene            | C33H47NO6   | nd | nd | nd | 0.1429 | nd     | nd     | nd     |
| 243 | (S)-(-)-Citronelllic acid, methyl ester                                                                                                              | C11H20O2    | nd | nd | nd | 1.3595 | nd     | nd     | nd     |
| 244 | 2-Pentene, 4-methyl-, (Z)-                                                                                                                           | C6H12       | nd | nd | nd | 0.3179 | nd     | nd     | nd     |
| 245 | cis-Z-à-Bisabolene epoxide                                                                                                                           | C15H24O     | nd | nd | nd | 0.1445 | 0.0148 | nd     | nd     |
| 246 | 4-Hexen-1-ol, 5-methyl-2-(1-methylethenyl)-, acetate                                                                                                 | C12H20O2    | nd | nd | nd | 0.6558 | nd     | nd     | nd     |
| 247 | .psi.,.psi.-Carotene, 1,1',2,2'-tetrahydro-1,1'-dimethoxy-                                                                                           | C42H64O2    | nd | nd | nd | 0.0366 | nd     | nd     | nd     |
| 248 | cis-5,8,11,14,17-Eicosapentaenoic acid                                                                                                               | C20H30O2    | nd | nd | nd | tr     | nd     | nd     | nd     |
| 249 | Benzene, 1,2-dimethoxy-4-propenyl-, (Z)-                                                                                                             | C11H14O2    | nd | nd | nd | tr     | nd     | 0.2755 | nd     |
| 250 | (1aR,4S,4aR,7R,7aS,7bS)-1,1,4,7-Tetramethyldecahydro-1H-cyclopropa[e]jazulen-4-ol                                                                    | C15H26O     | nd | nd | nd | 0.3467 | nd     | nd     | 0.5315 |
| 251 | Propanoic acid, 2-methyl-, (dodecahydro-6a-hydroxy-9a-methyl-3-methylene-2,9-dioxazulenol[4,5-b]furan-6-yl)methyl ester, [3aS-(3aà,6à,6aà,9aà,9bà)]- | C19H26O6    | nd | nd | nd | 0.0386 | nd     | nd     | 0.0357 |
| 252 | Brefeldin A                                                                                                                                          | C16H24O4    | nd | nd | nd | 0.0307 | nd     | nd     | nd     |
| 253 | 11,11-Dimethyl-4,8-dimethylenebicyclo[7.2.0]undecan-3-ol                                                                                             | C15H24O     | nd | nd | nd | 0.0626 | tr     | 0.2944 | nd     |
| 254 | .tau.-MuuroloI                                                                                                                                       | C15H26O     | nd | nd | nd | 0.8074 | nd     | nd     | nd     |
| 255 | Bicyclo[3.1.1]hept-3-en-2-one, 4,6,6-trimethyl-, (1S)-                                                                                               | C10H14O     | nd | nd | nd | nd     | 9.7675 | nd     | nd     |
| 256 | Bicyclo[2.2.1]heptan-2-one, 1,7,7-trimethyl-, (1S)-                                                                                                  | C10H16O     | nd | nd | nd | nd     | 4.0883 | nd     | 1.1876 |
| 257 | Bicyclo[2.2.1]heptan-2-ol, 1,7,7-trimethyl-, acetate, (1S-endo)-                                                                                     | C12H20O2    | nd | nd | nd | nd     | 1.5838 | nd     | nd     |
| 258 | Bicyclo[3.1.1]heptan-3-one, 2,6,6-trimethyl-, (1à,2à,5à)-                                                                                            | C10H16O     | nd | nd | nd | nd     | 1.4356 | nd     | nd     |
| 259 | 6-Octen-1-ol, 3,7-dimethyl-, (R)-                                                                                                                    | C10H20O     | nd | nd | nd | nd     | 1.2039 | nd     | 0.6678 |
| 260 | Bicyclo[3.1.1]hept-2-ene-2-methanol, 6,6-dimethyl-                                                                                                   | C10H16O     | nd | nd | nd | nd     | 0.6757 | nd     | nd     |
| 261 | Bicyclo[3.1.1]heptane-2-methanol, 6,6-dimethyl-, acetate                                                                                             | C12H20O2    | nd | nd | nd | nd     | 0.6360 | nd     | nd     |
| 262 | Pinocarvone                                                                                                                                          | C10H14O     | nd | nd | nd | nd     | 0.5421 | nd     | nd     |
| 263 | 2-Cyclohexen-1-one, 3-methyl-6-(1-methylethenyl)-, (S)-                                                                                              | C10H14O     | nd | nd | nd | nd     | 0.3344 | nd     | nd     |
| 264 | 2H-Pyran, tetrahydro-4-methyl-2-(2-methyl-1-propenyl)-                                                                                               | C10H18O     | nd | nd | nd | nd     | 0.1276 | 1.4923 | 0.0615 |
| 265 | 4,7,7-Trimethylbicyclo[4.1.0]hept-3-en-2-one                                                                                                         | C10H14O     | nd | nd | nd | nd     | 0.1158 | nd     | 3.2877 |
| 266 | Bicyclo[3.1.1]heptan-3-ol, 6,6-dimethyl-2-methylene-, [1S-(1à,3à,5à)]-                                                                               | C10H16O     | nd | nd | nd | nd     | 0.0655 | nd     | nd     |

## Supplementary Material

|     |                                                                                              |          |    |    |    |    |        |        |        |
|-----|----------------------------------------------------------------------------------------------|----------|----|----|----|----|--------|--------|--------|
| 267 | 3,9-Epoxy-p-mentha-1,8(10)-diene                                                             | C10H14O  | nd | nd | nd | nd | 0.0645 | nd     | nd     |
| 268 | 3,6-Octadienoic acid, 3,7-dimethyl-, methyl ester, (Z)-                                      | C11H18O2 | nd | nd | nd | nd | 0.0609 | nd     | nd     |
| 269 | Bisabolol oxide B                                                                            | C15H26O2 | nd | nd | nd | nd | 0.0588 | nd     | 0.9618 |
| 270 | 1-Isopropenyl-3-propenylcyclopentane                                                         | C11H18   | nd | nd | nd | nd | 0.0505 | nd     | nd     |
| 271 | Bornyl acetate                                                                               | C12H20O2 | nd | nd | nd | nd | 0.0473 | nd     | nd     |
| 272 | trans-Chrysanthenol                                                                          | C10H16O  | nd | nd | nd | nd | 0.0455 | nd     | 0.0347 |
| 273 | 7-Propylidene-bicyclo[4.1.0]heptane                                                          | C10H16   | nd | nd | nd | nd | 0.0374 | nd     | nd     |
| 274 | á-Pinene                                                                                     | C10H16   | nd | nd | nd | nd | 0.0318 | nd     | nd     |
| 275 | Cyclopentane, 1-acetoxymethyl-3-isopropenyl-2-methyl-                                        | C12H20O2 | nd | nd | nd | nd | 0.0264 | nd     | nd     |
| 276 | 3-Methyl-2-(2-methyl-2-butenyl)-furan                                                        | C10H14O  | nd | nd | nd | nd | 0.0213 | nd     | nd     |
| 277 | (1S,4R,5R)-1,3,3-Trimethyl-2-oxabicyclo[2.2.2]octan-5-yl acetate                             | C12H20O3 | nd | nd | nd | nd | 0.0204 | nd     | nd     |
| 278 | trans-Shisool                                                                                | C10H18O  | nd | nd | nd | nd | 0.0191 | nd     | nd     |
| 279 | Myrtenyl acetate                                                                             | C12H18O2 | nd | nd | nd | nd | 0.0172 | nd     | nd     |
| 280 | á-Ocimene                                                                                    | C10H16   | nd | nd | nd | nd | 0.0158 | nd     | nd     |
| 281 | 5-Hepten-2-one, 6-methyl-                                                                    | C8H14O   | nd | nd | nd | nd | tr     | nd     | nd     |
| 282 | Cyclohexane, 1-methyl-2,4-bis(1-methylethenyl)-                                              | C13H22   | nd | nd | nd | nd | tr     | nd     | nd     |
| 283 | 2H-Pyran-3-ol, tetrahydro-2,2,6-trimethyl-6-(4-methyl-3-cyclohexen-1-yl)-, [3S-[3á,6á(R*)]]- | C15H26O2 | nd | nd | nd | nd | tr     | nd     | 0.0307 |
| 284 | Geranyl vinyl ether                                                                          | C12H20O  | nd | nd | nd | nd | tr     | 0.0648 | nd     |
| 285 | Bicyclo[2.2.1]hept-2-ene, 1,7,7-trimethyl-                                                   | C10H16   | nd | nd | nd | nd | tr     | nd     | nd     |
| 286 | 1,5,5-Trimethyl-6-methylene-cyclohexene                                                      | C10H16   | nd | nd | nd | nd | tr     | nd     | nd     |
| 287 | Isopulegol                                                                                   | C10H18O  | nd | nd | nd | nd | tr     | nd     | nd     |
| 288 | Erythro-9,10-dihydroxyoctadecanoic acid                                                      | C18H36O4 | nd | nd | nd | nd | tr     | nd     | nd     |
| 289 | Bicyclo[3.1.1]hept-3-en-2-one, 4,6,6-trimethyl-                                              | C10H14O  | nd | nd | nd | nd | tr     | nd     | nd     |
| 290 | 1,6,10-Dodecatrien-3-ol, 3,7,11-trimethyl-, (E)-                                             | C15H26O  | nd | nd | nd | nd | tr     | nd     | nd     |
| 291 | 4-Hydroxy-1,2,5-trimethyl-4-piperidinecarbonitrile, (2á,4á,5á)-                              | C9H16N2O | nd | nd | nd | nd | tr     | nd     | nd     |
| 292 | 3-Caren-10-al                                                                                | C10H14O  | nd | nd | nd | nd | tr     | nd     | nd     |
| 293 | Ethanol                                                                                      | C2H6O    | nd | nd | nd | nd | tr     | nd     | nd     |
| 294 | trans-Verbenol                                                                               | C10H16O  | nd | nd | nd | nd | tr     | 0.1292 | tr     |
| 295 | Benzenemethanol, 4-methyl-á-(1-methyl-2-propenyl)-, (R*,R*)-                                 | C12H16O  | nd | nd | nd | nd | tr     | nd     | nd     |
| 296 | Isospathulenol                                                                               | C15H24O  | nd | nd | nd | nd | tr     | nd     | nd     |
| 297 | Di-epi-1,10-cubenol                                                                          | C15H26O  | nd | nd | nd | nd | tr     | nd     | nd     |
| 298 | Alloaromadendrene oxide-(1)                                                                  | C15H24O  | nd | nd | nd | nd | tr     | nd     | nd     |
| 299 | Butanoic acid, 2-hydroxy-3-methyl-4-(phenylmethoxy)-, [S-(R*,R*)]-                           | C12H16O4 | nd | nd | nd | nd | tr     | nd     | nd     |
| 300 | (Z)-2,6-Dimethylocta-2,5,7-trien-4-one                                                       | C10H14O  | nd | nd | nd | nd | tr     | nd     | nd     |
| 301 | Bicyclo[3.1.1]hept-3-en-2-ol, 4,6,6-trimethyl-, [1S-(1á,2á,5á)]-                             | C10H16O  | nd | nd | nd | nd | tr     | nd     | nd     |

|     |                                                                                                                                                                                                                          |            |    |    |    |    |    |        |        |
|-----|--------------------------------------------------------------------------------------------------------------------------------------------------------------------------------------------------------------------------|------------|----|----|----|----|----|--------|--------|
| 302 | 2,6-Octadienal, 3,7-dimethyl-, (E)-                                                                                                                                                                                      | C10H16O    | nd | nd | nd | nd | nd | 2.6581 | nd     |
| 303 | 17-Octadecynoic acid                                                                                                                                                                                                     | C18H32O2   | nd | nd | nd | nd | nd | 0.4751 | nd     |
| 304 | Geranyl formate                                                                                                                                                                                                          | C11H18O2   | nd | nd | nd | nd | nd | 0.2418 | nd     |
| 305 | Ledene oxide-(II)                                                                                                                                                                                                        | C15H24O    | nd | nd | nd | nd | nd | 0.1469 | nd     |
| 306 | Caryophylla-4(12),8(13)-dien-5-ol                                                                                                                                                                                        | C15H24O    | nd | nd | nd | nd | nd | 0.1361 | nd     |
| 307 | Isobornyl thiocynoacetate                                                                                                                                                                                                | C13H19NO2S | nd | nd | nd | nd | nd | 0.1064 | nd     |
| 308 | Cyclohexane, 1,1'-dodecylidenebis[4-methyl-                                                                                                                                                                              | C26H50     | nd | nd | nd | nd | nd | 0.0853 | nd     |
| 309 | 6,10-Dodecadien-1-yn-3-ol, 3,7,11-trimethyl-                                                                                                                                                                             | C15H24O    | nd | nd | nd | nd | nd | 0.0760 | nd     |
| 310 | Aromadendrene, dehydro-                                                                                                                                                                                                  | C15H22     | nd | nd | nd | nd | nd | 0.0653 | nd     |
| 311 | Eugenol                                                                                                                                                                                                                  | C10H12O2   | nd | nd | nd | nd | nd | 0.0542 | 2.7807 |
| 312 | 3,6-Octadienal, 3,7-dimethyl-                                                                                                                                                                                            | C10H16O    | nd | nd | nd | nd | nd | 0.0537 | nd     |
| 313 | 2H-Pyran, 3,6-dihydro-4-methyl-2-(2-methyl-1-propenyl)-                                                                                                                                                                  | C10H16O    | nd | nd | nd | nd | nd | 0.0441 | nd     |
| 314 | (-)-Globulol                                                                                                                                                                                                             | C15H26O    | nd | nd | nd | nd | nd | 0.0334 | nd     |
| 315 | (3R,3aR,3bR,4S,7R,7aR)-4-Isopropyl-3,7-dimethyloctahydro-1H-cyclopenta[1,3]cyclopropa[1,2]benzen-3-ol                                                                                                                    | C15H26O    | nd | nd | nd | nd | nd | 0.0318 | nd     |
| 316 | 9,17-Octadecadienal, (Z)-                                                                                                                                                                                                | C18H32O    | nd | nd | nd | nd | nd | 0.0282 | nd     |
| 317 | Methyl 4,7,10,13-hexadecatetraenoate                                                                                                                                                                                     | C17H26O2   | nd | nd | nd | nd | nd | 0.0243 | nd     |
| 318 | Cholestan-3-one, cyclic 1,2-ethanediyl aetal, (5á)-                                                                                                                                                                      | C29H50O2   | nd | nd | nd | nd | nd | 0.0210 | nd     |
| 319 | cis-Verbenol                                                                                                                                                                                                             | C10H16O    | nd | nd | nd | nd | nd | 0.0196 | nd     |
| 320 | 5-Hepten-3-yn-2-ol, 6-methyl-5-(1-methylethyl)-                                                                                                                                                                          | C11H18O    | nd | nd | nd | nd | nd | 0.0181 | nd     |
| 321 | à-Methyl-à-[4-methyl-3-pentenyl]oxiranemethanol                                                                                                                                                                          | C10H18O2   | nd | nd | nd | nd | nd | 0.0173 | nd     |
| 322 | Eicosane, 10-methyl-                                                                                                                                                                                                     | C21H44     | nd | nd | nd | nd | nd | 0.0157 | nd     |
| 323 | 1H-3a,7-Methanoazulene, octahydro-1,4,9,9-tetramethyl-                                                                                                                                                                   | C15H26     | nd | nd | nd | nd | nd | 0.0143 | nd     |
| 324 | Dimethyl sulfide                                                                                                                                                                                                         | C2H6S      | nd | nd | nd | nd | nd | 0.0128 | nd     |
| 325 | 2-Buten-1-one, 1-(2,6,6-trimethyl-1-cyclohexen-1-yl)-                                                                                                                                                                    | C13H20O    | nd | nd | nd | nd | nd | 0.0121 | nd     |
| 326 | Bicyclo[3.1.1]heptan-2-ol, 2,6,6-trimethyl-                                                                                                                                                                              | C10H18O    | nd | nd | nd | nd | nd | tr     | nd     |
| 327 | 4aH-cycloprop[e]azulen-4a-ol, decahydro-1,1,4,7-tetramethyl-                                                                                                                                                             | C15H26O    | nd | nd | nd | nd | nd | tr     | nd     |
| 328 | 5-Isopropyl-2-methylbicyclo[3.1.0]hexan-2-ol #                                                                                                                                                                           | C10H18O    | nd | nd | nd | nd | nd | tr     | nd     |
| 329 | Aromadendrene oxide-(2)                                                                                                                                                                                                  | C15H24O    | nd | nd | nd | nd | nd | tr     | nd     |
| 330 | 10,12-Octadecadiynoic acid                                                                                                                                                                                               | C18H28O2   | nd | nd | nd | nd | nd | tr     | nd     |
| 331 | 5aH-3a,12-Methano-1H-cyclopropa[5',6']cyclodeca[1',2':1,5]cyclopenta[1,2-d][1,3]dioxol-13-one, 1a,2,3,9,12,12a-hexahydro-9-hydroxy-10-(hydroxymethyl)-1,1,3,5,7,7-hexamethyl-, [1aR-(1aà,3aà,3aà,5aà,8aR*,9a,12a,12aà)]- | C23H32O5   | nd | nd | nd | nd | nd | tr     | nd     |
| 332 | Bicyclo[7.2.0]undec-4-ene, 4,11,11-trimethyl-8-methylene-, [1R-(1R*,4Z,9S*)]-                                                                                                                                            | C15H24     | nd | nd | nd | nd | nd | tr     | 3.7460 |
| 333 | n-Nonenylsuccinic anhydride                                                                                                                                                                                              | C13H20O3   | nd | nd | nd | nd | nd | tr     | nd     |
| 334 | 7-Oxabicyclo[4.1.0]heptane, 1-methyl-4-(2-methyloxiranyl)-                                                                                                                                                               | C10H16O2   | nd | nd | nd | nd | nd | tr     | nd     |

## Supplementary Material

|     |                                                                                                                                                                                            |            |    |    |    |    |    |    |        |
|-----|--------------------------------------------------------------------------------------------------------------------------------------------------------------------------------------------|------------|----|----|----|----|----|----|--------|
| 335 | 9,10-Secocholesta-5,7,10(19)-triene-3,24,25-triol, (3á,5Z,7E)-<br>Dodecanoic acid, 1a,2,5,5a,6,9,10,10a-octahydro-5,5a-dihydroxy-4-<br>(hydroxymethyl)-1,1,7,9-tetramethyl-11-oxo-1H-2,8a- | C27H44O3   | nd | nd | nd | nd | nd | tr | 0.0125 |
| 336 | methanocyclopenta[a]cyclopropa[e]cyclodecen-6-yl ester, [1aR-<br>(1áá,2á,5á,5áá,6á,8áá,9á,10áá)]-                                                                                          | C32H50O6   | nd | nd | nd | nd | nd | tr | nd     |
| 337 | 1b,5,5,6a-Tetramethyl-octahydro-1-oxa-cyclopropa[a]inden-6-one                                                                                                                             | C13H20O2   | nd | nd | nd | nd | nd | tr | nd     |
| 338 | Ethanethiol                                                                                                                                                                                | C2H6S      | nd | nd | nd | nd | nd | tr | nd     |
| 339 | Thujone                                                                                                                                                                                    | C10H16O    | nd | nd | nd | nd | nd | nd | 9.2938 |
| 340 | 1,2,4,5-Tetrazine                                                                                                                                                                          | C2H2N4     | nd | nd | nd | nd | nd | nd | 1.8961 |
| 341 | 1-Hydroxybicyclo[2.2.2]oct-5-en-2-yl, methyl ketone                                                                                                                                        | C10H14O2   | nd | nd | nd | nd | nd | nd | 1.6909 |
| 342 | (1R,5S,6R)-2,7,7-Trimethylbicyclo[3.1.1]hept-2-en-6-yl acetate                                                                                                                             | C12H18O2   | nd | nd | nd | nd | nd | nd | 1.6581 |
| 343 | 2-Cyclohexen-1-one, 4-hydroxy-3,5,5-trimethyl-4-(3-methyl-1,3-butadienyl)-,<br>[S-(E)]-                                                                                                    | C14H20O2   | nd | nd | nd | nd | nd | nd | 0.8519 |
| 344 | 6,7-Isoquinolinediol, 1,2,3,4-tetrahydro-2-methyl-<br>2,4,6-Decatrienoic acid, 1a,2,5,5a,6,9,10,10a-octahydro-5,5a-dihydroxy-4-<br>(hydroxymethyl)-1,1,7,9-tetramethyl-11-oxo-1H-2,8a-     | C10H13NO2  | nd | nd | nd | nd | nd | nd | 0.8328 |
| 345 | methanocyclopenta[a]cyclopropa[e]cyclodecen-6-yl ester, [1aR-<br>(1áá,2á,5á,5áá,6á,8áá,9á,10áá)]-                                                                                          | C30H40O6   | nd | nd | nd | nd | nd | nd | 0.6222 |
| 346 | Galactonic phenylhydrazide                                                                                                                                                                 | C12H18N2O6 | nd | nd | nd | nd | nd | nd | 0.5114 |
| 347 | Cyclohexanol, 2-methyl-5-(1-methylethenyl)-                                                                                                                                                | C10H18O    | nd | nd | nd | nd | nd | nd | 0.4844 |
| 348 | Octadecanal, 2-bromo-                                                                                                                                                                      | C18H35BrO  | nd | nd | nd | nd | nd | nd | 0.4528 |
| 349 | à-Cubebene                                                                                                                                                                                 | C15H24     | nd | nd | nd | nd | nd | nd | 0.4433 |
| 350 | 4-[4-(2-Methoxyphenyl)-1H-pyrazol-3-yl]benzene-1,3-diol                                                                                                                                    | C16H14N2O3 | nd | nd | nd | nd | nd | nd | 0.4106 |
| 351 | Nonane, 2,2,4,4,6,8,8-heptamethyl-                                                                                                                                                         | C16H34     | nd | nd | nd | nd | nd | nd | 0.3141 |
| 352 | 8-Oxabicyclo[4.3.0]nonane, 7,9-dimethyl-                                                                                                                                                   | C10H18O    | nd | nd | nd | nd | nd | nd | 0.3096 |
| 353 | 2-(2,6,6-Trimethylcyclohex-1-enyl)cyclopropanecarboxylic acid, methyl ester                                                                                                                | C14H22O2   | nd | nd | nd | nd | nd | nd | 0.3071 |
| 354 | 1,1,4a-Trimethyl-5,6-dimethylenedecahydronaphthalene                                                                                                                                       | C15H24     | nd | nd | nd | nd | nd | nd | 0.2165 |
| 355 | 2-[1-(Adamantan-1-ylamino)-2,2,2-trifluoro-ethylidene]-malononitrile                                                                                                                       | C15H16F3N3 | nd | nd | nd | nd | nd | nd | 0.2053 |
| 356 | Farnesyl bromide                                                                                                                                                                           | C15H25Br   | nd | nd | nd | nd | nd | nd | 0.1983 |
| 357 | Longiverbenone                                                                                                                                                                             | C15H22O    | nd | nd | nd | nd | nd | nd | 0.0950 |
| 358 | Junenol                                                                                                                                                                                    | C15H26O    | nd | nd | nd | nd | nd | nd | 0.0625 |
| 359 | Phenanthrene, 7-ethenyl-1,2,3,4,4a,4b,5,6,7,9,10,10a-dodecahydro-1,1,4a,7-<br>tetramethyl-, [4aS-(4áá,4bá,7á,10áá)]-                                                                       | C20H32     | nd | nd | nd | nd | nd | nd | 0.0479 |
| 360 | Threo-9,10-dihydroxyoctadecanoic acid                                                                                                                                                      | C18H36O4   | nd | nd | nd | nd | nd | nd | 0.0420 |
| 361 | (1aR,3aS,7S,7aS,7bR)-1,1,3a,7-Tetramethyldecahydro-1H-<br>cyclopropa[a]naphthalen-7-ol                                                                                                     | C15H26O    | nd | nd | nd | nd | nd | nd | 0.0139 |
| 362 | (R)-lavandulyl acetate                                                                                                                                                                     | C12H20O2   | nd | nd | nd | nd | nd | nd | tr     |
| 363 | 1,7,7-Trimethylbicyclo[2.2.1]hept-5-en-2-one                                                                                                                                               | C10H14O    | nd | nd | nd | nd | nd | nd | tr     |
| 364 | 1,1,4,7-Tetramethyldecahydro-1H-cyclopropa[e]azulene-4,7-diol                                                                                                                              | C15H26O2   | nd | nd | nd | nd | nd | nd | tr     |
| 365 | Fenretinide                                                                                                                                                                                | C26H33NO2  | nd | nd | nd | nd | nd | nd | tr     |



|     |                                                                       |            |    |    |    |    |    |    |    |
|-----|-----------------------------------------------------------------------|------------|----|----|----|----|----|----|----|
| 366 | 3,9á:14,15-Diepoxy pregn-16-en-20-one, 3,11á,18-triacetoxy-           | C27H34O9   | nd | nd | nd | nd | nd | nd | tr |
| 367 | Phenylalanine, 4-amino-N-t-butyloxycarbonyl-, t-butyl ester           | C18H28N2O4 | nd | nd | nd | nd | nd | nd | tr |
| 368 | Phenol, 3,5-bis(1,1-dimethylethyl)-                                   | C14H22O    | nd | nd | nd | nd | nd | nd | tr |
| 369 | 9-Octadecenoic acid, (2-phenyl-1,3-dioxolan-4-yl)methyl ester, trans- | C28H44O4   | nd | nd | nd | nd | nd | nd | tr |

“nd” indicates that the substance was not detected under analytical conditions used; “tr”, trace (<0.01%)

**Supplementary Table S2.** Relative content (%) of differential metabolites of seven Lamiaceae plant hydrosols.

| No. | compound name                                                                                                                            | Tv HD    | Tm HD    | Mp HD    | Mo HD    | Ro HD    | Se HD    | La HD    |
|-----|------------------------------------------------------------------------------------------------------------------------------------------|----------|----------|----------|----------|----------|----------|----------|
| 1   | (-)-Spathulenol                                                                                                                          | 0.01401  | 0.11765  | 0.064009 | 2.205837 | 0.071774 | 2.802394 | 1.341928 |
| 2   | Caryophyllene oxide                                                                                                                      | 0.277498 | 0.156312 | 0.134865 | 1.264009 | 0.047988 | 2.426255 | 0.668724 |
| 3   | Thymol                                                                                                                                   | 18.84038 | 19.5366  | 0        | 1.367523 | 0.069203 | 5.320654 | 1.091876 |
| 4   | $\alpha$ -Cadinol                                                                                                                        | 0.03082  | 0.021817 | 0.202994 | 0.623824 | 0.032565 | 0.46114  | 0.578713 |
| 5   | Terpinen-4-ol                                                                                                                            | 0        | 4.22033  | 0        | 0.552772 | 0.0001   | 0.368022 | 0.180324 |
| 6   | 1-Octen-3-ol                                                                                                                             | 1.613522 | 1.907123 | 0.027349 | 0        | 0        | 0        | 0        |
| 7   | Benzene, 2-methoxy-4-methyl-1-(1-methylethyl)-                                                                                           | 6.276236 | 2.240502 | 0        | 0        | 0        | 0        | 0        |
| 8   | o-Cymene                                                                                                                                 | 2.398435 | 0.341036 | 0        | 0        | 0        | 0        | 0        |
| 9   | Phenol, 2-methyl-5-(1-methylethyl)-                                                                                                      | 1.856015 | 1.868988 | 0.180678 | 0        | 0        | 0.0001   | 0        |
| 10  | 2,6-Octadienal, 3,7-dimethyl-, (Z)-                                                                                                      | 0        | 0        | 0        | 0.679711 | 0        | 1.683126 | 0        |
| 11  | 2-Cyclohexen-1-one, 3-methyl-6-(1-methylethylidene)-                                                                                     | 0.0001   | 0        | 0.106602 | 0        | 0.045177 | 0        | 0        |
| 12  | 3-Cyclohexene-1-carboxaldehyde, 1,3,4-trimethyl-                                                                                         | 0.150194 | 0        | 0        | 0        | 0        | 0.017408 | 0        |
| 13  | Benzene, 1-methyl-4-(1-methylethenyl)-                                                                                                   | 0.059654 | 0        | 0        | 0        | 0.02374  | 0        | 0        |
| 14  | Butanoic acid, 4-pentenyl ester                                                                                                          | 0.128713 | 0.0001   | 0        | 0        | 0        | 0        | 0        |
| 15  | Caryophyllene                                                                                                                            | 0.182264 | 0        | 0.130751 | 0        | 0        | 0        | 0        |
| 16  | $\zeta$ -Murolene                                                                                                                        | 0.116118 | 0        | 0.0001   | 0        | 0        | 0        | 0        |
| 17  | Cyclohexanol, 5-methyl-2-(1-methylethenyl)-                                                                                              | 0.0001   | 0.011759 | 0        | 0        | 0.0001   | 0        | 0        |
| 18  | Phenol, 5-methyl-2-(1-methylethyl)-, acetate                                                                                             | 0.074789 | 0.402967 | 0        | 0        | 0        | 0        | 0        |
| 19  | exo-2,7,7-trimethylbicyclo[2.2.1]heptan-2-ol                                                                                             | 0        | 0.04446  | 0        | 0        | 0        | 0.0001   | 0        |
| 20  | Phenol, 2-methoxy-3-(2-propenyl)-                                                                                                        | 0        | 0.233054 | 0        | 0        | 0        | 0        | 0.05372  |
| 21  | (S)-2,2,6-Trimethyl-6-((S)-4-methylcyclohex-3-en-1-yl)dihydro-2H-pyran-3(4H)-one                                                         | 0        | 0        | 0.0001   | 0.257715 | 0.035906 | 0        | 0.435725 |
| 22  | 1,4-Methanoazulen-3-ol, decahydro-1,5,5,8a-tetramethyl-, [1S-(1 $\alpha$ ,3 $\alpha$ ,3 $\alpha\alpha$ ,4 $\alpha$ ,8 $\alpha\alpha$ )]- | 0        | 0        | 0.0001   | 0        | 0.0001   | 0        | 0        |

|    |                                                                                                                                                                                                                                                  |   |   |          |          |          |          |          |
|----|--------------------------------------------------------------------------------------------------------------------------------------------------------------------------------------------------------------------------------------------------|---|---|----------|----------|----------|----------|----------|
| 23 | 1H-2,8a-Methanocyclopenta[a]cyclopropa[e]cyclo<br>decen-11-one, 1a,2,5,5a,6,9,10,10a-<br>octahydro-5,5a,6-trihydroxy-1,4-<br>bis(hydroxymethyl)-1,7,9-trimethyl-, [1S-<br>(1a,1aα,2a,5a,5aα,6a,8a,9a,10aα)]-<br>(1aR,4S,4aR,7R,7aS,7bS)-1,1,4,7- | 0 | 0 | 0.018152 | 0        | 0.012501 | 0        | 0        |
| 24 | Tetramethyldecahydro-1H-<br>cyclopropa[e]azulen-4-ol                                                                                                                                                                                             | 0 | 0 | 0        | 0.346675 | 0        | 0        | 0.531467 |
| 25 | Cyclohexanol, 2-methyl-5-(1-<br>methylethenyl)-, (1a,2a,5a)-                                                                                                                                                                                     | 0 | 0 | 0        | 0.404762 | 0        | 0.30067  | 0        |
| 26 | Propanoic acid, 2-methyl-, (dodecahydro-<br>6a-hydroxy-9a-methyl-3-methylene-2,9-<br>dioxoazuleno[4,5-b]furan-6-yl)methyl<br>ester, [3aS-(3aα,6a,6aα,9a,9bα)]-                                                                                   | 0 | 0 | 0        | 0.038631 | 0        | 0        | 0.035684 |
| 27 | Terpineol                                                                                                                                                                                                                                        | 0 | 0 | 0        | 0.43236  | 0        | 0.339362 | 0        |

## Supplementary Figures

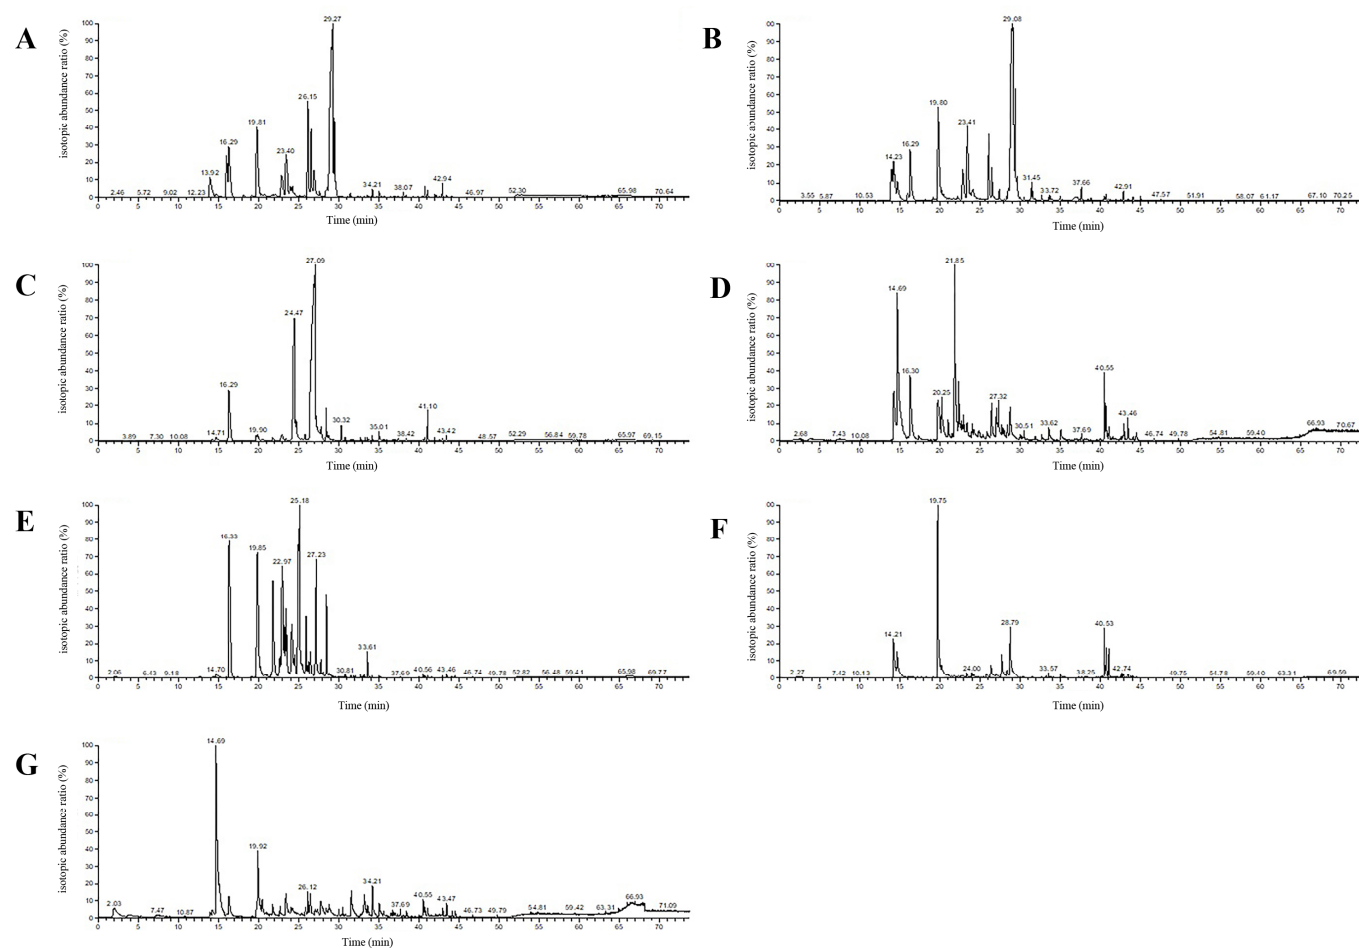

**Supplementary Figure S1.** Total ion current diagram of seven Lamiaceae plant hydrosols. (A) *Thymus vulgaris*; (B) *Thymus mongolicus*; (C) *Mentha × piperita*; (D) *Melissa officinalis*; (E) *Rosmarinus officinalis*; (F) *Salvia elegans*; (G) *Leonurus artemisia*.
